# Supplementary material for: Differential diagnostic roles of the serum CA19-9, total bilirubin (TBIL) and the ratio of CA19-9 to TBIL for benign and malignant
Source: PubMed Central journal article supplement — J Cancer. 2018 Apr 19;9(10):1804–12. doi: 10.7150/jca.25093 (PMC5968769; doi:10.7150/jca.25093), 2018-04-19
Supplement: jcav09p1804s1.pdf [file jcav09p1804s1.pdf]

## Supplementary material

Table S1 The statistical description of the increase-folds of TBIL, increase-folds of CA19-9 and the ratio of increase-folds of CA19-9 to increase-folds of TBIL in MOJ and BOJ

|                | TBIL  |        | CA19-9  |         | Ratio   |        |
|----------------|-------|--------|---------|---------|---------|--------|
|                | MOJ   | BOJ    | MOJ     | BOJ     | MOJ     | BOJ    |
| Minimum        | 1.10  | 1.05   | 0.02    | 0.02    | 0.00    | 0.00   |
| 25% Percentile | 3.58  | 2.38   | 2.95    | 0.57    | 0.61    | 0.14   |
| Median         | 6.26  | 4.80   | 10.67   | 1.56    | 1.84    | 0.35   |
| 75% Percentile | 9.57  | 8.02   | 28.82   | 4.00    | 5.56    | 0.84   |
| Maximum        | 23.27 | 25.50  | 2934.00 | 30.50   | 1646.00 | 6.66   |
| Mean           | 7.10  | 5.95   | 76.52   | 3.55    | 14.96   | 0.79   |
| Std. Deviation | 4.62  | 4.63   | 278.20  | 5.26    | 93.35   | 1.20   |
| Std. Error     | 0.25  | 0.36   | 15.04   | 0.41    | 5.05    | 0.09   |
| Lower 95% CI   | 6.61  | 5.24   | 46.93   | 2.74    | 5.04    | 0.61   |
| Upper 95% CI   | 7.60  | 6.66   | 106.10  | 4.35    | 24.89   | 0.98   |
| <i>P</i> value |       | 0.0085 |         | <0.0001 |         | 0.0053 |

Table S2 The statistical description of the increase-folds of TBIL, increase-folds of CA19-9 and the ratio of increase-folds of CA19-9 to increase-folds of TBIL in different etiologies of MOJ

|                | TBIL               |                           |                              | CA19-9             |                           |                              | Ratio              |                           |                             |
|----------------|--------------------|---------------------------|------------------------------|--------------------|---------------------------|------------------------------|--------------------|---------------------------|-----------------------------|
|                | Cholangiocarcinoma | Pancreatic adenocarcinoma | Peri-ampullar adenocarcinoma | Cholangiocarcinoma | Pancreatic adenocarcinoma | Peri-ampullar adenocarcinoma | Cholangiocarcinoma | Pancreatic adenocarcinoma | Periampullar adenocarcinoma |
| Minimum        | 1.00               | 1.00                      | 1.23                         | 0.00               | 0.00                      | 0.02                         | 0.01               | 0.00                      | 0.00                        |
| 25% Percentile | 4.00               | 4.00                      | 2.93                         | 3.00               | 3.00                      | 2.40                         | 0.55               | 0.58                      | 0.61                        |
| Median         | 7.00               | 6.00                      | 4.41                         | 12.00              | 12.00                     | 5.41                         | 1.55               | 2.28                      | 1.68                        |
| 75% Percentile | 11.00              | 8.00                      | 8.65                         | 28.00              | 31.00                     | 26.67                        | 5.39               | 5.71                      | 5.50                        |
| Maximum        | 22.00              | 23.00                     | 19.73                        | 1539.00            | 2706.00                   | 2934.00                      | 186.00             | 1646.00                   | 148.70                      |
| Mean           | 7.95               | 6.66                      | 6.14                         | 67.54              | 89.00                     | 81.16                        | 7.88               | 25.36                     | 9.22                        |
| Std. Deviation | 4.83               | 4.13                      | 4.69                         | 190.30             | 312.40                    | 367.20                       | 21.40              | 144.40                    | 23.57                       |
| Std. Error     | 0.44               | 0.35                      | 0.58                         | 17.60              | 26.50                     | 45.54                        | 1.97               | 12.29                     | 2.92                        |
| Lower 95% CI   | 7.07               | 5.97                      | 4.98                         | 32.68              | 36.60                     | 9.82                         | 3.98               | 1.05                      | 3.38                        |
| Upper 95% CI   | 8.83               | 7.35                      | 7.31                         | 102.40             | 141.40                    | 172.10                       | 11.79              | 49.67                     | 15.06                       |
| P value        |                    |                           | 0.0163                       |                    |                           | <0.0001                      |                    |                           | >0.05                       |

Table S3 The statistical description of the increase-folds of TBIL, increase-folds of CA19-9 and the ratio of increase-folds of CA19-9 to increase-folds of TBIL in different etiologies of BOJ

|                | TBIL   |       |       |           |         | CA19-9 |       |       |           |         | Ratio  |      |      |           |         |
|----------------|--------|-------|-------|-----------|---------|--------|-------|-------|-----------|---------|--------|------|------|-----------|---------|
|                | Chole- | IRSC  | PSC   | Stricture | Adenoma | Chole- | IRSC  | PSC   | Stricture | Adenoma | Chole- | IRSC | PSC  | Stricture | Adenoma |
| Minimum        | 1.05   | 1.06  | 2.16  | 1.09      | 1.44    | 0.02   | 0.02  | 0.35  | 0.09      | 0.20    | 0.01   | 0.00 | 0.02 | 0.02      | 0.02    |
| 25% Percentile | 2.25   | 2.25  | 4.68  | 2.47      | 2.16    | 0.59   | 0.55  | 0.90  | 0.55      | 0.52    | 0.19   | 0.12 | 0.09 | 0.14      | 0.10    |
| Median         | 4.05   | 5.05  | 9.07  | 3.54      | 6.23    | 2.07   | 1.30  | 3.45  | 1.58      | 1.15    | 0.44   | 0.27 | 0.49 | 0.38      | 0.28    |
| 75% Percentile | 5.50   | 9.02  | 20.18 | 5.52      | 9.43    | 4.01   | 3.67  | 6.19  | 2.57      | 3.34    | 0.86   | 0.89 | 0.63 | 0.77      | 0.38    |
| Maximum        | 19.83  | 20.99 | 25.50 | 9.94      | 12.42   | 30.50  | 21.54 | 10.31 | 18.11     | 4.43    | 5.85   | 6.66 | 1.92 | 5.71      | 2.40    |
| Mean           | 4.56   | 6.25  | 11.47 | 4.17      | 6.70    | 3.82   | 3.17  | 3.77  | 2.93      | 1.69    | 0.90   | 0.73 | 0.51 | 0.83      | 0.44    |
| Std. Deviation | 3.49   | 4.45  | 8.00  | 2.53      | 3.93    | 6.30   | 4.53  | 3.07  | 4.76      | 1.49    | 1.32   | 1.14 | 0.52 | 1.50      | 0.68    |
| Std. Error     | 0.50   | 0.51  | 2.31  | 0.70      | 1.18    | 0.91   | 0.52  | 0.89  | 1.27      | 0.47    | 0.19   | 0.13 | 0.15 | 0.42      | 0.20    |
| Lower 95% CI   | 3.55   | 5.24  | 6.39  | 2.64      | 4.06    | 1.99   | 2.14  | 1.82  | 0.18      | 0.62    | 0.51   | 0.47 | 0.18 | -0.076    | -0.017  |
| Upper 95% CI   | 5.58   | 7.27  | 16.55 | 5.70      | 9.34    | 5.65   | 4.21  | 5.72  | 5.68      | 2.75    | 1.28   | 0.99 | 0.83 | 1.74      | 0.89    |
| P value        |        |       |       |           | <0.0001 |        |       |       |           | >0.05   |        |      |      |           | >0.05   |

Chole-, cholelithiasis; Stricture, inflammatory stricture; IRSC, IgG4 related sclerosing cholangitis; PSC, Primary sclerosing cholangitis.
